# Supplementary material
Source: PubMed Central journal article supplement (PMC4198054)
Supplement: embj0033-1599-sd3.pdf [file embj0033-1599-sd3.pdf]

**A**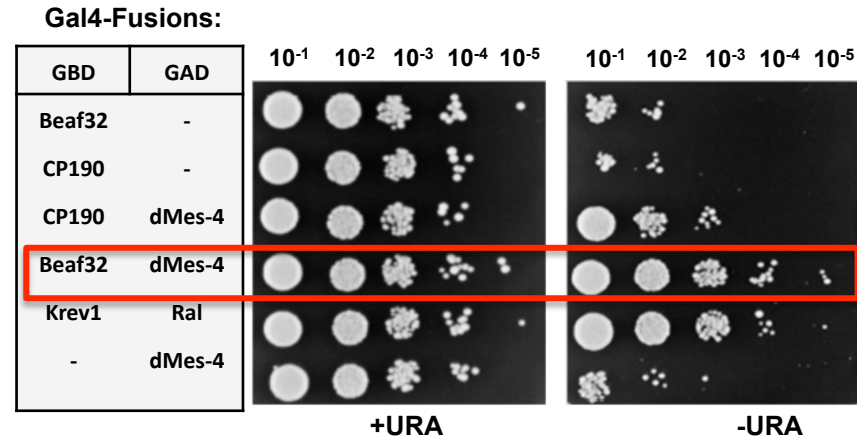**B**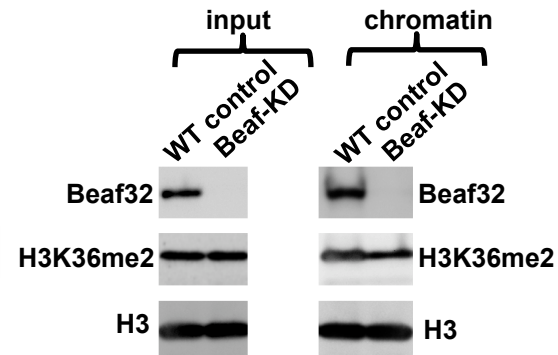**C**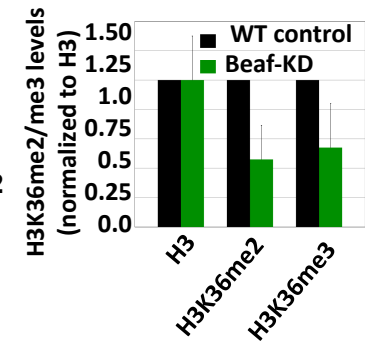**D**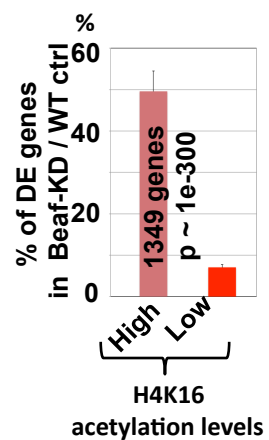**E**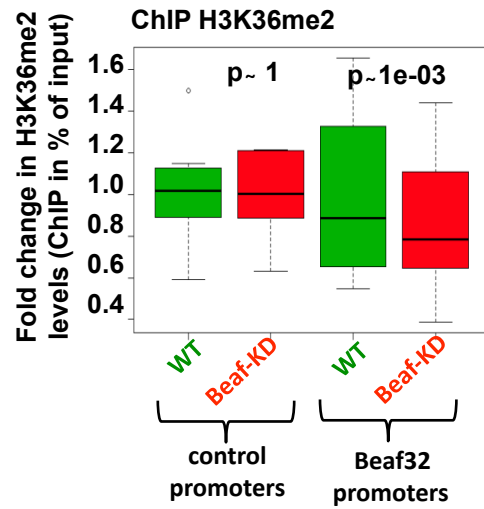**F**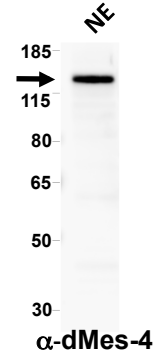**G**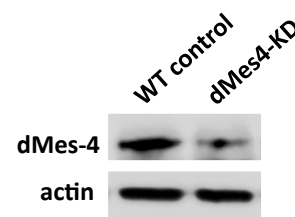**H**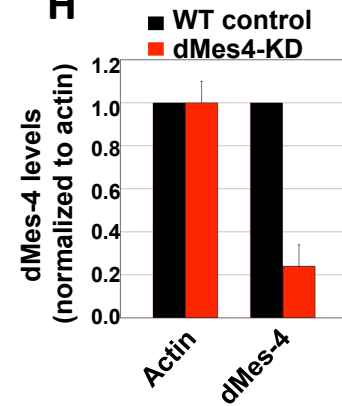

### **Figure S3. Characterization of dMes-4 and insulator protein depletions**

**A.** Beaf32 directly interacts with dMes-4. Data obtained by yeast 2 hybrid using the indicated various combinations of bait and target constructs expressing fusion protein Beaf32, dMes-4 and CP190 proteins compared to positive controls (Krev1-Ral) in cells replicated on nonselective (+Ura) or selective (-Ura) plates (see Methods).

**B.** Western blotting analysis of chromatin fractions purified through sucrose cushions ('chromatin'; see Methods) prepared from Beaf32-KD or control cells or of the corresponding nuclear extracts ('input'), using anti-Beaf32, anti-H3K36me2 antibodies or total anti-histone H3 for loading control.

**C.** Quantification of H3K36me2/3 levels in Beaf32-KD or control cells as compared to loading control from the western blotting analysis in Figure 2E and in panel B (see Methods).

**D.** Histogram showing the percentage of DE genes as determined by expression analysis in Beaf32-KD compared to WT cells as a function of the levels of histone acetylation (H4K16ac; High or Low, light red and red bar, respectively) within the corresponding promoter regions (-500 to 0 bp from TSS).

**E.** Box plot showing the results of ChIP performed in Beaf32-KD (red boxes) compared to WT-control (mock-depleted) cells (green boxes) in percent of input (y-axis) with anti- H3K36me2 antibodies or IgG control, for promoters harboring a Beaf32 site or not as indicated. ChIP data were analyzed by qPCR analyses in triplicates and for three independent measures normalized to three control loci (see Methods).

**F.** Western blotting analysis of nuclear extracts using anti-dMes-4 antibodies. The arrow indicates the unique band detected corresponding to the molecular weight of dMes-4 (1423 AA).

**G.** Western blotting analysis of nuclear extracts prepared from dMes-4-KD or control cells using anti-dMes-4 or anti-actin control antibodies for loading control. The efficiency of dMes-4-KD was confirmed by RTqPCR analysis (see Figure 4A).

**H.** Quantification of dMes-4 depletion as compared to loading control from the western blotting analysis in panel F (see Methods).
