# Supplementary material
Source: PubMed Central journal article supplement (PMC4198054)
Supplement: embj0033-1599-sd4.pdf [file embj0033-1599-sd4.pdf]

**A**

| Gene Ontology (GO)                        | Depletion | p-value  | Number of genes |
|-------------------------------------------|-----------|----------|-----------------|
| Cell proliferation                        | dMes-4    | 2.24E-08 | 88              |
|                                           | Beaf32    | 9,18E-08 | 78              |
| Cell-death                                | dMes-4    | 6.24E-05 | 57              |
|                                           | Beaf32    | 1.90E-08 | 54              |
| Nucleoside triphosphate metabolic process | dMes-4    | ~1       |                 |
|                                           | Beaf32    | ~1       |                 |

**B**

| Factor | Consensus | Enrichment (E-value) |
|--------|-----------|----------------------|
| Beaf32 | CGATA     | 1 <sup>e</sup> -60   |
| DREF   | TATCGATA  | 1 <sup>e</sup> -59   |

#### **Figure S4. dMes-4 and Beaf32 co-regulate specific Gene Ontologies**

**A.** Examples of gene ontologies enriched among the differentially expressed genes as measured by DGE-Seq in Beaf32-KD or Mes4-KD compared to control cells and as identified through DGE-Seq (threshold for DE genes p-value < 1e-3).

**B.** The 4,120 Beaf32 peaks identified by ChIP-Seq (see Figure 1A) harbor two consensus motifs that are recognized by Beaf32 and DREF, in agreement with the involvement of both factors in co-regulating specific gene ontologies (GO) including the cell cycle (see panel A; see Expanded Table E1)(Emberly et al., 2008). Also indicated are the associated E-values as obtained by motif searches through MEME (see Methods).
