# Supplementary material
Source: PubMed Central journal article supplement (PMC4198054)
Supplement: embj0033-1599-sd11.pdf [file embj0033-1599-sd11.pdf]

**Table S1:** Table listing the most significant Gene Ontologies (GO) represented among the most significantly differentially expressed genes in Beaf32-KD compared to WT cells identified by RNA-Seq from three combined experiments. ‘Number (TOT)’ is the number of genes for each GO, ‘FREQ’ the total frequency of genes

| GO_TERM                            | TOTAL  |        | INSULATOR |        |           |
|------------------------------------|--------|--------|-----------|--------|-----------|
|                                    | NUMBER | FREQ   | NUMBER    | FREQ   | P_VALUE   |
| cell cycle                         | 402    | 0.0397 | 103       | 0.0829 | 4.00E-14  |
| system development                 | 1671   | 0.1651 | 288       | 0.2317 | 2.13E-11  |
| cell differentiation               | 1070   | 0.1057 | 199       | 0.1601 | 8.06E-11  |
| homeostatic process                | 202    | 0.02   | 58        | 0.0467 | 1.44E-10  |
| ribonucleotide binding             | 893    | 0.0818 | 176       | 0.1271 | 1.61E-10  |
| purine nucleotide binding          | 960    | 0.0879 | 186       | 0.1343 | 1.99E-10  |
| biopolymer metabolic process       | 3492   | 0.3451 | 512       | 0.4119 | 2.79E-08  |
| transferase activity               | 511    | 0.0468 | 107       | 0.0773 | 2.81E-08  |
| protein localization               | 365    | 0.0361 | 80        | 0.0644 | 5.50E-08  |
| nucleoside, nucleotide             | 1640   | 0.1621 | 261       | 0.21   | 3.83E-07  |
| regulation of cell size            | 56     | 0.0055 | 20        | 0.0161 | 3.99E-06  |
| appendage development              | 256    | 0.0253 | 56        | 0.0451 | 4.87E-06  |
| organelle fission                  | 177    | 0.0175 | 41        | 0.033  | 2.03E-05  |
| programmed cell death              | 207    | 0.0205 | 46        | 0.037  | 2.04E-05  |
| cytoskeletal protein binding       | 215    | 0.0197 | 48        | 0.0347 | 2.78E-05  |
| hydrolase activity, acting on acid | 605    | 0.0554 | 107       | 0.0773 | 6.06E-05  |
| cation binding                     | 1481   | 0.1356 | 231       | 0.1668 | 6.11E-05  |
| cell-cell signaling                | 236    | 0.0233 | 49        | 0.0394 | 6.57E-05  |
| fusome organization                | 14     | 0.0014 | 8         | 0.0064 | 6.98E-05  |
| cellular response to stress        | 177    | 0.0175 | 39        | 0.0314 | 9.31E-05  |
| synapse organization               | 64     | 0.0063 | 18        | 0.0145 | 0.0003372 |
| cellular macromolecule loc         | 280    | 0.0277 | 53        | 0.0426 | 0.000342  |
| nucleus organization               | 39     | 0.0039 | 13        | 0.0105 | 0.0003796 |
| enzyme binding                     | 63     | 0.0058 | 18        | 0.013  | 0.0004036 |
| asymmetric cell division           | 57     | 0.0056 | 15        | 0.0121 | 0.0019148 |
| stem cell division                 | 49     | 0.0048 | 13        | 0.0105 | 0.0033381 |
